# Supplementary material
Source: publisher figshare collection journal article supplement (https://tandf.figshare.com/ndownloader/files/13300880)
Supplement: Supplementary file 1 [file 13300880]

**“Supporting Information”**

**Adsorption sensitivity of pristine, Al- and Si-doped boron nitride nanoflake to COCl2: A DFT study**

Roghaye Moladust *a*, Mehdi D. Esrafili *,*b* Esmail Vessally *,*c* , Akram Hosseinian *d*

*a* Department of Chemistry, Faculty of Basic Sciences, University of Mohaghegh Ardabili, Ardabil, Iran

*b* Laboratory of Theoretical Chemistry, Department of Chemistry, University of Maragheh, Maragheh, Iran

*c* Department of Chemistry, Payame Noor University, Tehran, Iran

*c* Department of Chemistry, Payame Noor University, Iran

*d* Department of Engineering Science, College of Engineering, University of Tehran, P.O. Box 11365‑4563, Tehran, Iran

* Corresponding Author.E-mails: [esrafili@maragheh.ac.ir](mailto:esrafili@maragheh.ac.ir) (M.D. Esrafili); vessally@yahoo.com (E. Vessally).

**Table S1.** The M06-2X/6-311+G(d) calculated adsorption energies (Ead, kJ/mol), charge transfer (qCT, e), HOMO and LUMO energies (eV), HOMO(SOMO)-LUMO energy gap (Eg, eV) and its change (%ΔEg) relative to the pristine surface

| surface/complex | Ead | qCT | EHOMO/SOMO | ELUMO | Eg | %ΔEg |
| --- | --- | --- | --- | --- | --- | --- |
| **BNNF** | - | - | -8.14 | -0.26 | 7.88 | - |
| **A** | -13.94 | 0.002 | -8.18 | -0.65 | 7.53 | -4.4 |
| **B** | -29.25 | 0.028 | -8.14 | -0.75 | 7.39 | -6.2 |
| **Al-BNNF** | - | - | -8.15 | -0.56 | 7.59 | - |
| **C** | -80.58 | 0.148 | -7.88 | -2.56 | 5.32 | -29.9 |
| **Si-BNNF** | - | - | -6.39 | -0.26 | 6.13 | - |
| **D** | -181.82 | 0.662 | -7.26 | -0.33 | 6.93 | 13.1 |
